# Supplementary material for: An ab initio study of the rovibronic spectra of CH
Source: Royal Society of Chemistry journal article supplement (doi:10.1039/d4cp03298e), 2024-12-06
Supplement: d4cp03298e1.pdf [file d4cp03298e1.pdf]

# An *ab initio* study of the rovibronic spectrum of CH

Zhenlu Hou,<sup>a, b</sup> Linhua Liu<sup>\*b</sup>

<sup>a</sup> State Nuclear Power Demonstration Plant Co. Ltd, Rongcheng City, Shandong Province, 264312, People's Republic of China

<sup>b</sup> School of Energy and Power Engineering, Shandong University, Jinan, 250061, People's Republic of China.

Email: liulinhua@sdu.edu.cn (L. Liu)

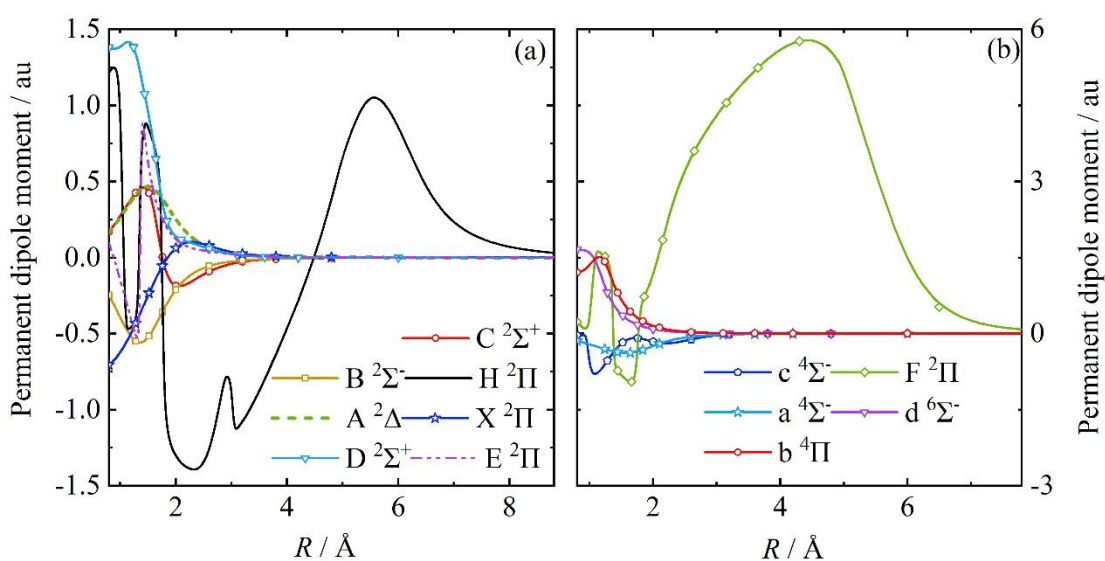

Figure S1: Permanent dipole moments for the electronic states of CH computed in this work.

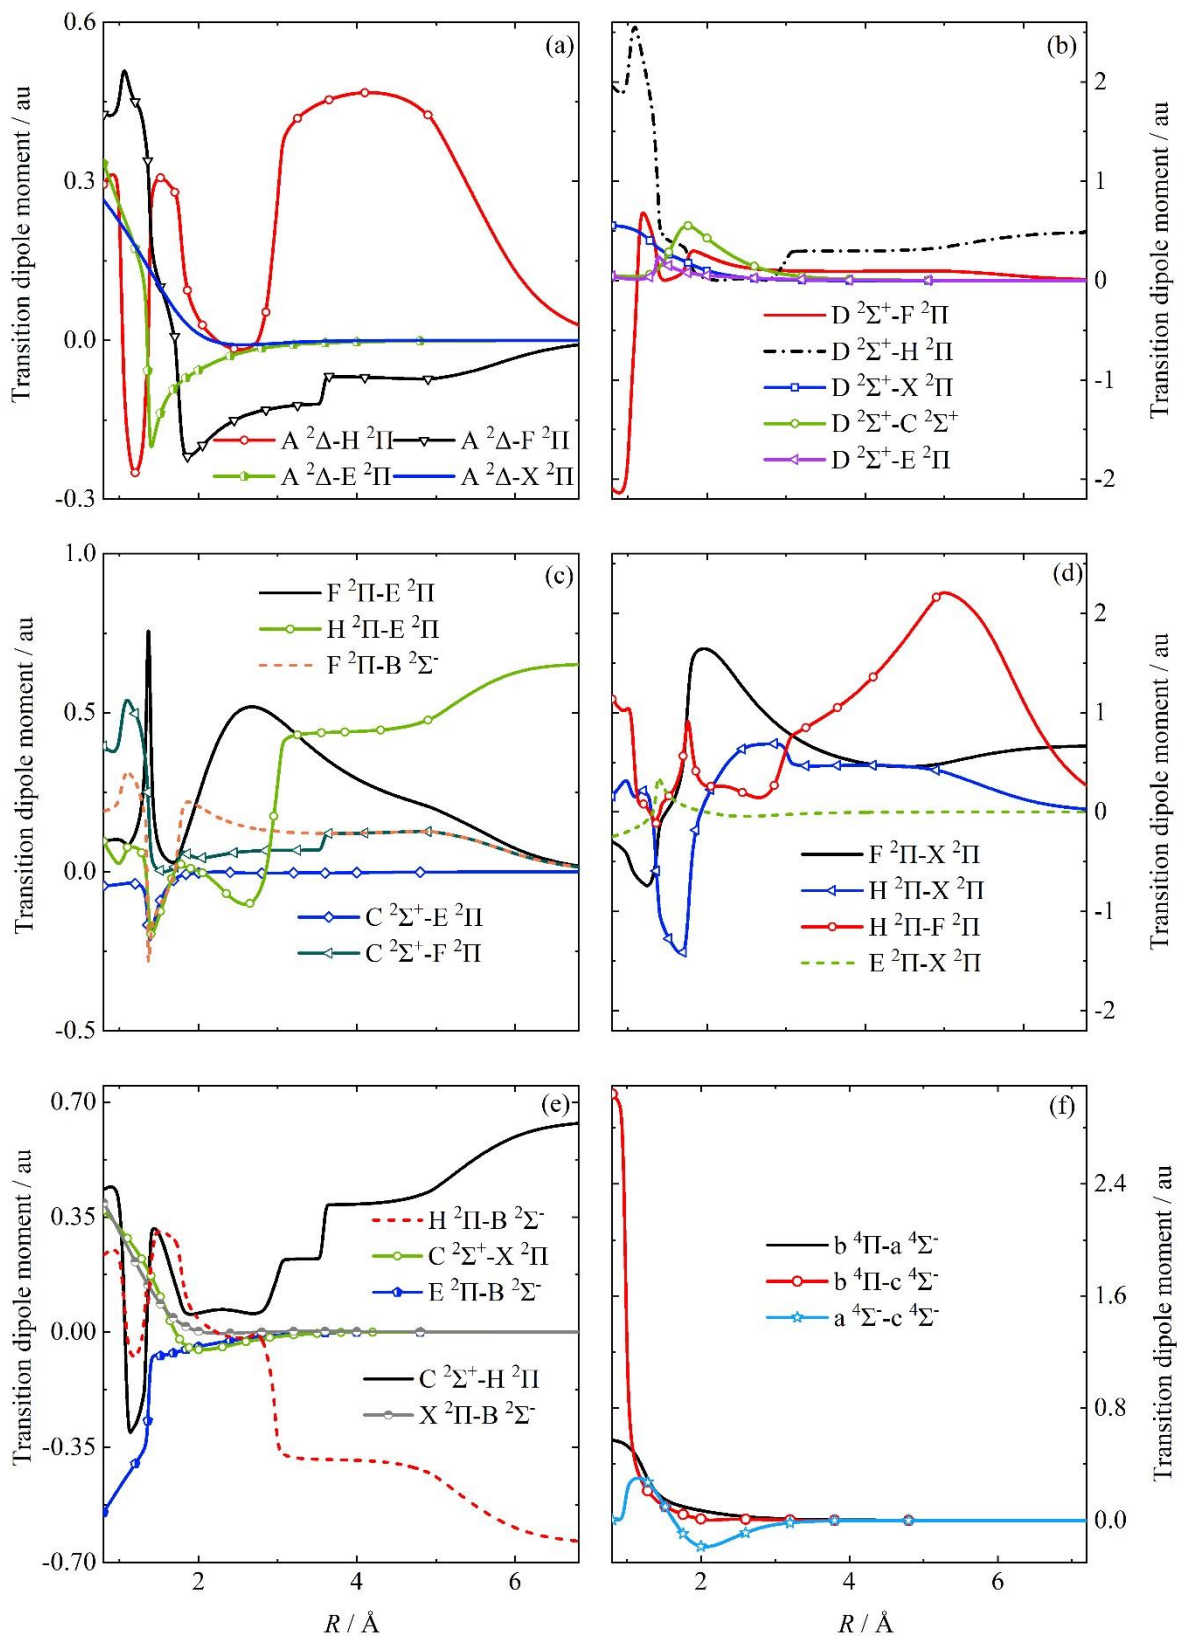

**Figure S2:** Transition dipole moments of CH molecule in the adiabatic representations.

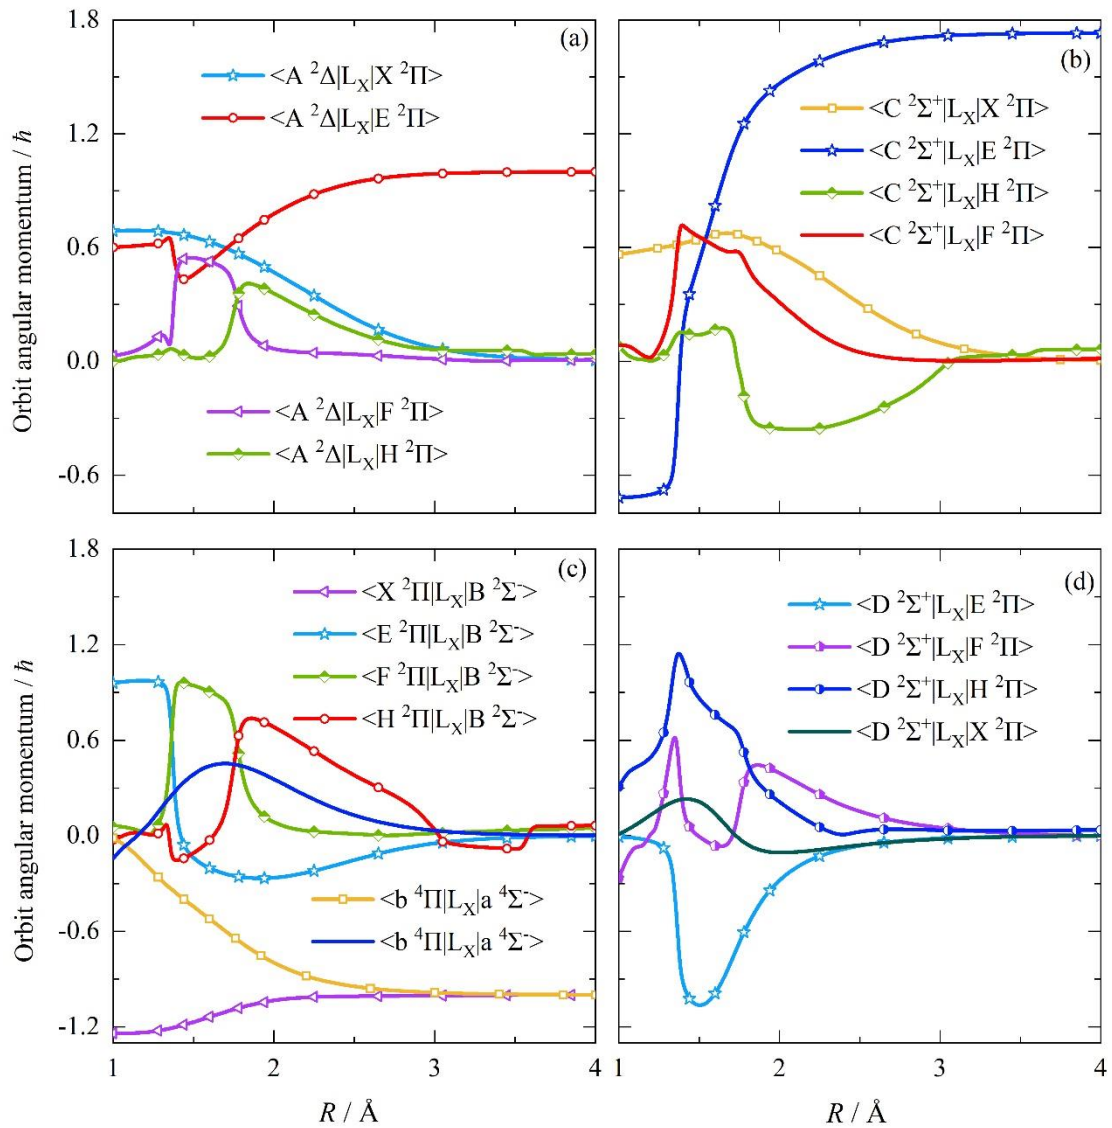

**Figure S3:** *Ab initio* electronic angular momentum curves of CH molecule in the adiabatic representations.

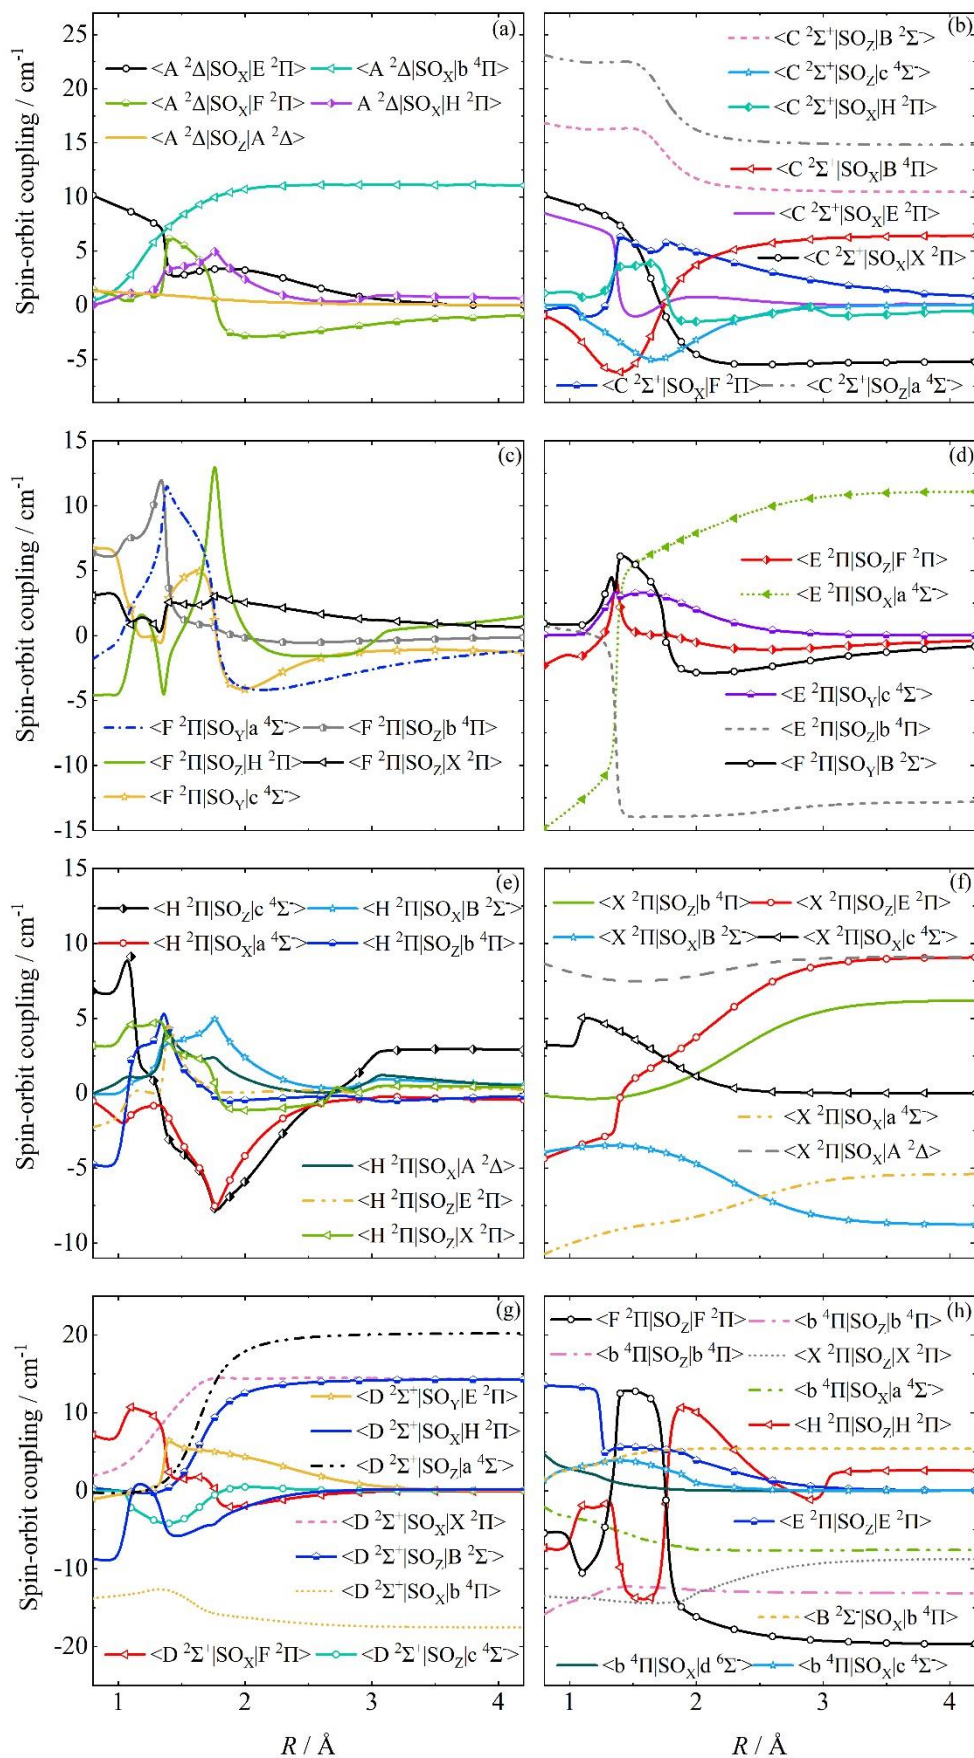

**Figure S4:** *Ab initio* spin-orbit MOLRPO matrix elements of CH molecule in the adiabatic

representations.

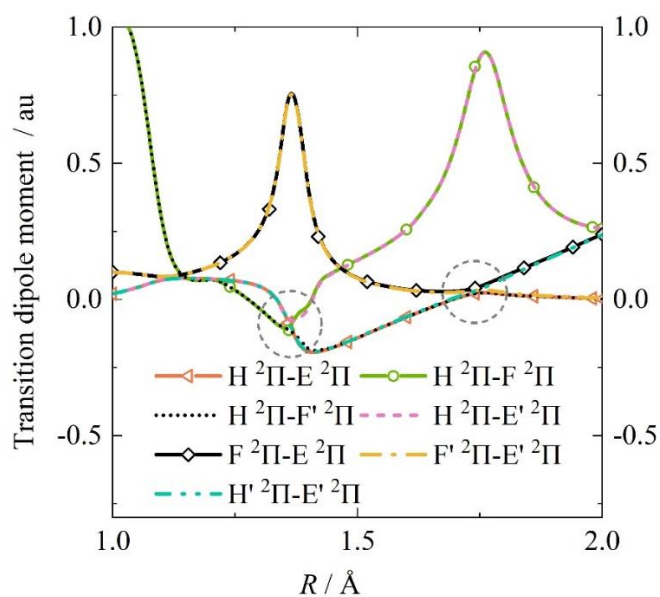

**Figure S5:** TDMs for the  $H^2\Pi-E^2\Pi$ ,  $H^2\Pi-F^2\Pi$ , and  $F^2\Pi-E^2\Pi$  transitions.

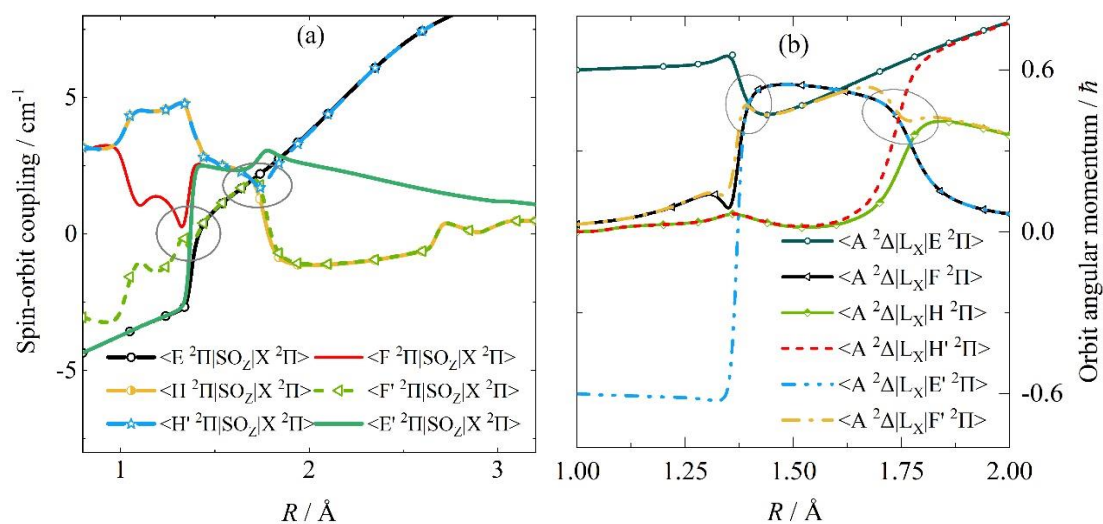

**Figure S6:** Illustrations of the diabatic and adiabatic representations of (a) SOC for the  $H^2\Pi-X^2\Pi$ ,  $F^2\Pi-X^2\Pi$  and  $E^2\Pi-X^2\Pi$  transitions as well as (b) EMACs for the  $A^2\Delta-E^2\Pi$ ,  $A^2\Delta-F^2\Pi$ , and  $A^2\Delta-H^2\Pi$  transitions.

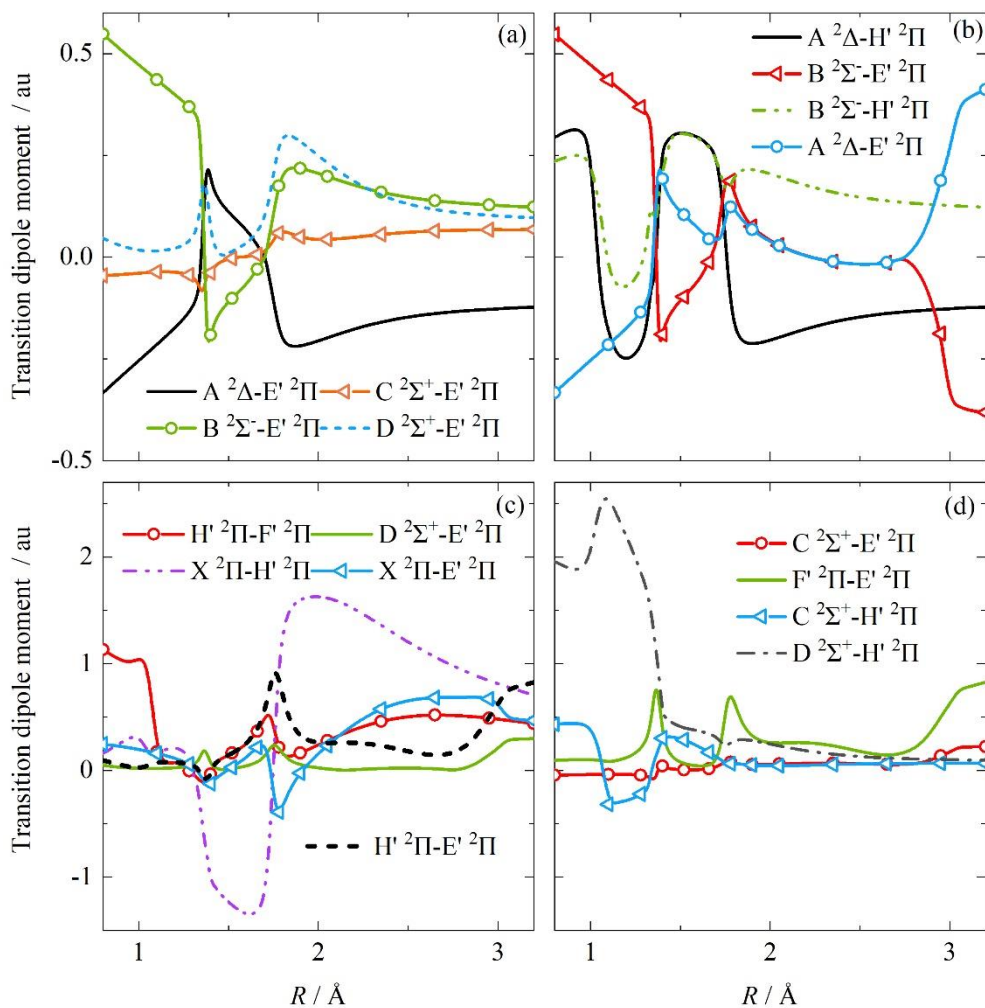

**Figure S7:** Transition dipole moments of CH molecule in the diabatic representations.

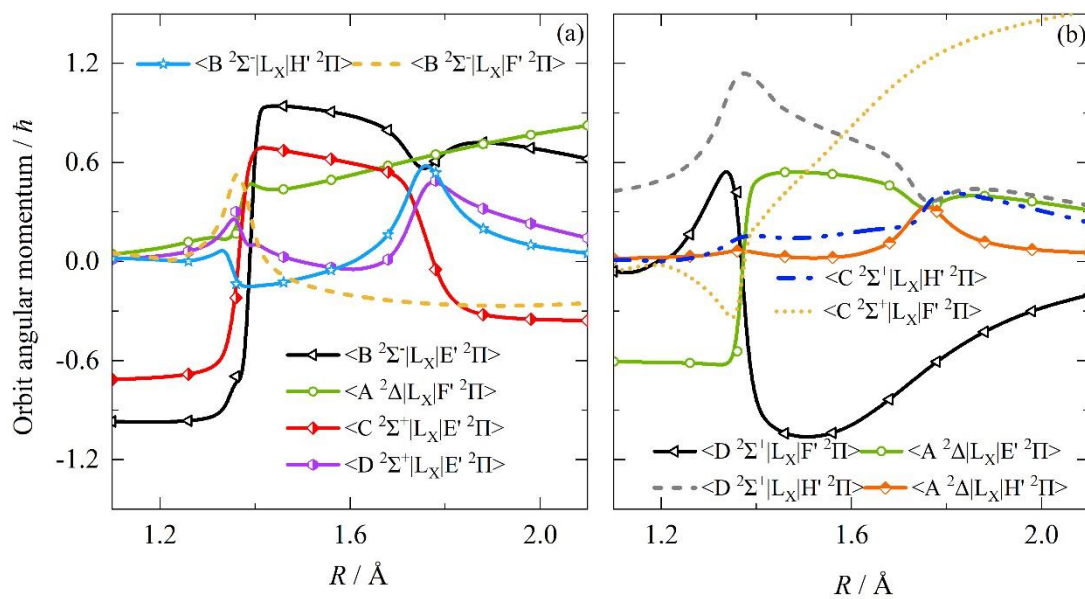

**Figure S8:** Electronic angular momentum curves of CH molecule in the diabatic representations.

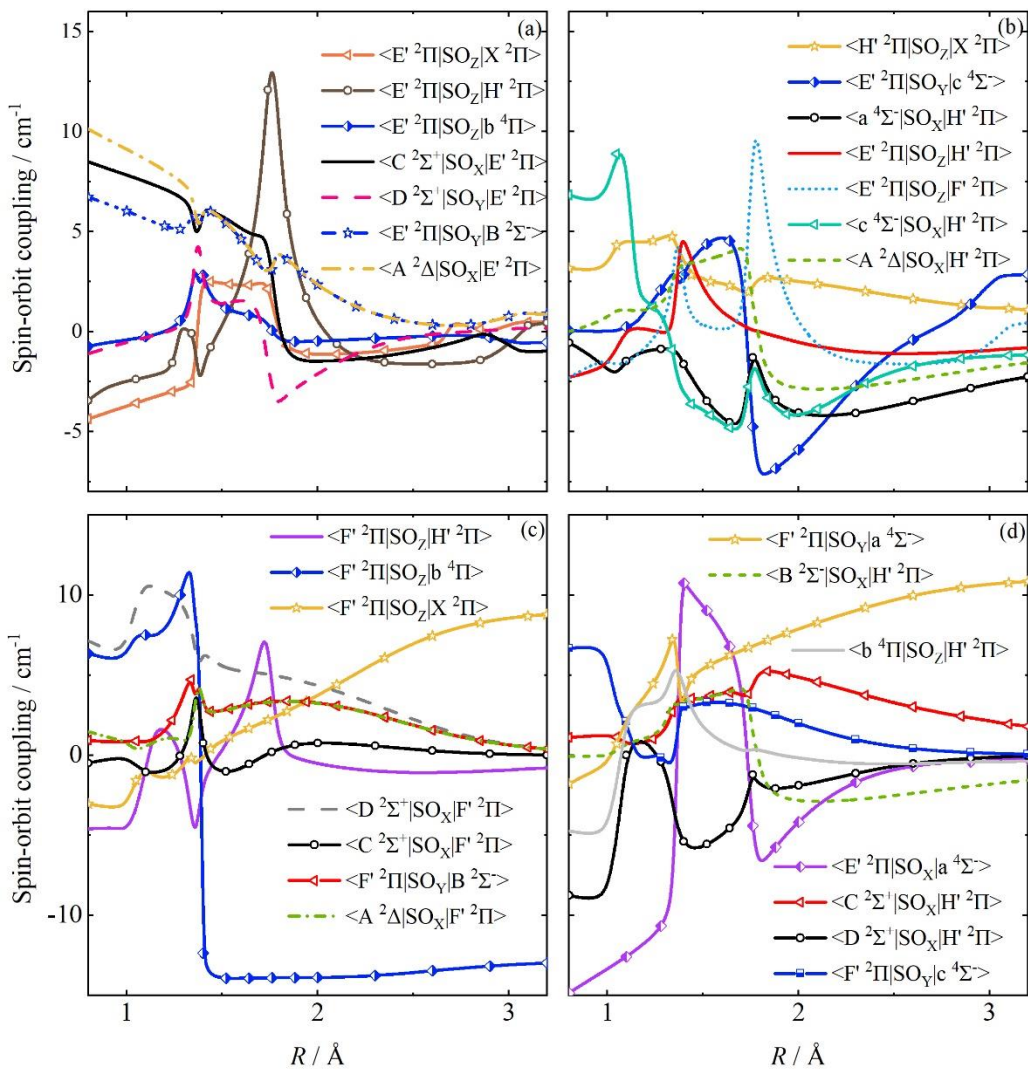

**Figure S9:** Spin-orbit coupling curves of CH molecule in the diabatic representations.
